# Supplementary material
Source: HighWire-hosted journal article supplement (https://genome.cshlp.org/content/suppl/2012/08/22/22.9.1813)
Supplement: SuppLegends.docx [file SuppLegends.docx]

**Fig. S1. Quality control of ChIP-seq inputs. A)** Cross-correlation profile for a typical input dataset. **B)** Input with very strong “Sono-Seq” effect (Auerbach et al. 2009). Such inputs and any ChIP-seq derived from the same sonication should not be used for analysis.

**Fig. S2. One of a limited number of strong sites in an otherwise mediocre dataset.** ChIP-seq was performed against EGR1 in K562 cells (“rep2” from Fig. 6). The binding site looks fairly strong by visual inspection. However, after using global metrics to evaluate the ChIP and determining it was suboptimal, the experiment was repeated, resulting in significantly improved quality control metrics and a higher number of called sites.

**Fig. S3. ChIP-seq quality metrics thresholds used by ENCODE.** **(A)** NRF, **(B)** RSC, **(C)** NSC.
